# Supplementary material
Source: publisher figshare collection journal article supplement (https://acs.figshare.com/ndownloader/files/9009394)
Supplement: Supplementary file 1 [file 9009394]

*Supporting Information*

Tracking reactive water and hydrogen-bonding networks in photosynthetic oxygen evolution

\*Bridgette A. Barry, Udit Brahmachari, and Zhanjun Guo

Author affiliations: School of Chemistry and Biochemistry  
and the Petit Institute for Bioengineering and Biosciences,  
Georgia Institute of Technology, Atlanta, GA 30332

\*Corresponding author: Bridgette A. Barry, Department of Chemistry and Biochemistry,  
Georgia Institute of Technology, 901 Atlantic Drive NW, Atlanta, GA 30332-0400,  
[bridgette.barry@chemistry.gatech.edu](mailto:bridgette.barry@chemistry.gatech.edu)

Table S1: Summary of assignments in the 3200-2000  $\text{cm}^{-1}$  region of the  $S_2$ -minus- $S_1$  RIFT-IR spectrum

| Reference                   | PSII preparation*                                                | Temperature, pH       | Position                                                                     | $^{18}\text{O}$ -shift | Assignment                                                                                                                                  |
|-----------------------------|------------------------------------------------------------------|-----------------------|------------------------------------------------------------------------------|------------------------|---------------------------------------------------------------------------------------------------------------------------------------------|
| Noguchi <sup>1</sup> , 2002 | <i>Synechococcus elongatus</i>                                   | 283 K, pH 6.0         | 3000 $\text{cm}^{-1}$                                                        | N.D. <sup>a</sup>      | Proton polarizability band, $S_2$ State                                                                                                     |
| Barry <sup>2</sup> , 2013   | Spinach                                                          | 263 and 283 K, pH 7.5 | 2880 $\text{cm}^{-1}$                                                        | N.D.                   | Protonated water cluster, $S_2$ state                                                                                                       |
| Barry <sup>3</sup> , 2013   | Spinach                                                          | 263 K, pH 7.5         | 2880 $\text{cm}^{-1}$                                                        | N.D.                   | Protonated water cluster, $S_2$ state                                                                                                       |
| Noguchi <sup>4</sup> , 2014 | <i>T. elongatus</i> , Tris-washed (inactive in oxygen evolution) | 250 K, pH 6.5         | “Broad positive feature around 2800 $\text{cm}^{-1}$ ”                       | N.D.                   | Protonated histidine in a putative $\text{YZ}^{\bullet}$ -minus- $\text{YZ}$ spectrum, but see ref; <sup>7</sup> proton polarizability band |
|                             | <i>T. elongatus</i>                                              | N.S. <sup>b</sup>     | “Around 3000 $\text{cm}^{-1}$ ”                                              | No                     | $S_2$ state                                                                                                                                 |
|                             | Spinach                                                          | N.S.                  | “Around 3000 $\text{cm}^{-1}$ ”                                              | N.D.                   | $S_2$ state                                                                                                                                 |
| Debus <sup>5</sup> , 2014   | <i>Synechocystis</i> sp. PCC 6803                                | 273 K, pH 6.0         | “Centered at 3000 $\text{cm}^{-1}$ ”                                         | No                     | Proton polarizability band, $S_2$ state                                                                                                     |
| Noguchi <sup>6</sup> , 2016 | Spinach                                                          | 283 K, pH 6.0         | “Broad positive feature at 3200–2500 $\text{cm}^{-1}$ ”                      | N.D.                   | OH bond of hydrogen bonded water, $S_2$ state                                                                                               |
| Barry <sup>7</sup> , 2016a  | Spinach                                                          | 190 K, pH 6.0 and 7.5 | 2900/2740 $\text{cm}^{-1}$ , NaCl sensitive                                  | Yes                    | Protonated water cluster, $S_2$ state                                                                                                       |
| Barry <sup>8</sup> , 2016b  | Spinach                                                          | 263 and 283 K, pH 7.5 | 2830 $\text{cm}^{-1}$ (at both temperatures)                                 | Yes                    | Protonated water cluster, $S_2$ state                                                                                                       |
| Noguchi <sup>9</sup> , 2017 | Spinach                                                          | 283 K, pH 6.0         | Around 2900 $\text{cm}^{-1}$ (positive) and 2700 $\text{cm}^{-1}$ (negative) | N.D.                   | Protonated histidine, $S_2$ state                                                                                                           |

\*Preparation used as isolated, unless noted

<sup>a</sup> Not determined; <sup>b</sup> Not specified

## References

1. Noguchi, T.; Sugiura M. FTIR Detection of Water Reactions during the Flash-induced S-state Cycle of the Photosynthetic Water-oxidizing Complex. *Biochemistry* **2002**; *41*, 15706-15712.
2. Polander, B. C.; Barry, B. A. Detection of an Intermediary, Protonated Water Cluster in Photosynthetic Oxygen Evolution. *Proc. Natl. Acad. Sci. USA* **2013**, *110*, 10634-10639.
3. Polander, B. C.; Barry, B. A. Calcium, Strontium, and Protein Dynamics During the S<sub>2</sub> to S<sub>3</sub> Transition in the Photosynthetic Oxygen-Evolving Cycle. *J. Phys. Chem. Lett.* **2013**, *4*, 3356-3362.
4. Nakamura, S.; Nagao, R.; Takahashi, R.; Noguchi, T. Fourier Transform Infrared Detection of a Polarizable Proton Trapped between Photooxidized Tyrosine Yz and a Coupled Histidine in Photosystem II: Relevance to the Proton Transfer Mechanism of Water Oxidation. *Biochemistry* **2014**, *53*, 3131-3144.
5. Debus, R. J. Evidence from FTIR Difference Spectroscopy That D1-Asp61 Influences the Water Reactions of the Oxygen-Evolving Mn<sub>4</sub>CaO<sub>5</sub> Cluster of Photosystem II. *Biochemistry* **2014**, *53*, 2941-2955.
6. Nakamura, S.; Ota, K.; Shibuya, Y.; Noguchi, T. Role of a Water Network around the Mn<sub>4</sub>CaO<sub>5</sub> Cluster in Photosynthetic Water Oxidation: A Fourier Transform Infrared Spectroscopy and Quantum Mechanics/Molecular Mechanics Calculation Study. *Biochemistry* **2016**, *55*, 597-607.
7. Guo, Z.; Barry, B. A. Cryogenic Trapping and Isotope Editing Identify a Protonated Water Cluster as an Intermediate in the Photosynthetic Oxygen-Evolving Reaction. *J. Phys. Chem. B* **2016**, *120*, 8794-8808.
8. Brahmachari U.; Barry, B. A. Dynamics of Proton Transfer to Internal Water during the Photosynthetic Oxygen-evolving Cycle. *J. Phys. Chem. B* **2016**, *120*: 11464-11473.
9. Nakamura, S.; Noguchi, T. Infrared Determination of the Protonation State of a Key Histidine Residue in the Photosynthetic Water Oxidizing Center. *J. Am. Chem. Soc.* **2017**, DOI: 10.1021/jacs.7b04924.
